# Supplementary material for: Joint optimal operation of the South-to-North Water Diversion Project considering the evenness of water deficit
Source: Copernicus journal article supplement (doi:10.5194/hess-2023-228), 2023-10-04
Supplement: Supplementary file [file hess-2023-228-AC2-supplement.pdf]

**Ref: No. hess-2023-228.** “Joint optimal operation of the South-to-North Water Diversion Project considering the evenness of water deficit” by Zhou et al.

November 28, 2023

**Dear RC#2,**

We thank you for the constructive comments and suggestions on our manuscript entitled “Joint optimal operation of the South-to-North Water Diversion Project considering the evenness of water deficit” (**No. hess-2023-228**).

We have thoroughly revised the original manuscript accordingly. All of the changes we have made are **marked in red** in the revised manuscript. Point-by-point responses to the comments are attached to this letter. Our responses to comments are marked in **bold blue**. The original manuscript cited is indicated in *black italics*, and the modified text is shown in *red italics*. We hope that you will find this updated manuscript to your satisfaction and consider it for publication in *Hydrology and Earth System Sciences*.

Thank you for taking the time to consider our research and we look forward to hearing from you.

Sincerely,

Prof. Dr. Guohua Fang

College of Water Conservancy and Hydropower Engineering,

Hohai University, Nanjing 210098, P. R. China

E-mail: hhufgh@163.com

## Reply to reviewer' comment

### Reviewer #2: Manuscript Review

#### Overall comment

The content is very relevant, as inter-basin water transfer (or transboundary systems) can alleviate the water deficit crisis caused by the uneven distribution of water resources. This new approach/index (i.e., Water Deficit Evenness Index – WDEI) seems to be a very efficient manner to sharing the pressure of water scarcity as a social demand objective, although some uncertainty in this methodology may be still relevant. Additionally, the English of the manuscript seems to be very good, congratulations. Here below and attached are some recommendations.

#### Response:

**Thank you very much for your recognition of our work, you have provided us with very valuable comments to improve the quality of this paper. We have tried our best to digest your comments and made corresponding improvements carefully. Point-by-point responses are attached below.**

**Comment 1.** Lines 32 – 34: Some references should be included in order to support your statement in these lines. I would recommend regional studies.

#### Response 1:

**Thanks to your comments. We have reorganized the statement of the mentioned lines and provided some references for clarity. The revisions are shown as below:**

*“Influenced by the impacts of global climate change, human activities, and increasing water demand, issues like regional water resource deficits, flood and drought disasters, and the conflicts between water supply and demand are progressively intensifying (Florke et al., 2018; Kato and Endo, 2017; Ma et al., 2020; Rossi and Peres, 2023). These social issues have become one of the key factors constraining regional and even global sustainable development and environmental protection (Li et al., 2020; Liu et*

*al., 2021; Tian and Destech Publicat, 2017). Inter-basin Water transfer projects have been widely constructed worldwide as an effective way to address water deficit issues caused by uneven distribution of water resources, and improve their utilization efficiency (Medeiros and Sivapalan, 2020; Sun et al., 2021; Wei et al., 2022).” (Lines 31-38 in updated manuscript; Lines 32-39 in old version)*

**Comment 2.** Lines 37 – 38: I would include more studies in this statement “Inter-basin Water transfer projects have been widely constructed worldwide (references)”. I would recommend adding the references below, as they provide some examples of how the inter-basin water transfer impacted the water availability in these water demand regions. Or you could include them in Line 44, in order to support your statement.

Medeiros, P., & Sivapalan, M. (2020). From hard-path to soft-path solutions: slow–fast dynamics of human adaptation to droughts in a water scarce environment. *Hydrological Sciences Journal*, 65(11), 1803-1814.

Ghoreishi, M., Elshorbagy, A., Razavi, S., Blöschl, G., Sivapalan, M., & Abdelkader, A. (2022). Cooperation in a Transboundary River Basin: a Large Scale Socio-hydrological Model of the Eastern Nile. *Hydrology and Earth System Sciences Discussions*, 2022, 1-24.

Wei, Y., Wei, J., Li, G., Wu, S., Yu, D., Ghoreishi, M., ... & Tian, F. (2022). A sociohydrological framework for understanding conflict and cooperation with respect to transboundary rivers. *Hydrology and Earth System Sciences*, 26(8), 2131-2146.

Lu, Y., Tian, F., Guo, L., Borzi, I., Patil, R., Wei, J., ... & Sivapalan, M. (2021). Sociohydrologic modeling of the dynamics of cooperation in the transboundary Lancang–Mekong River. *Hydrology and Earth System Sciences*, 25(4), 1883-1903.

**Response 2:**

**Thank you for your comments. We have included and clarified the references you**

listed in the appropriate places to support our statements about the implementation of inter-basin water transfer projects worldwide. The revisions are shown as below:

*“Inter-basin Water transfer projects have been widely constructed worldwide as an effective way to address water deficit issues caused by uneven distribution of water resources, and improve their utilization efficiency (Medeiros and Sivapalan, 2020; Sun et al., 2021; Wei et al., 2022). At least 10 % of the cities worldwide receive water from IBWD projects (McDonald et al., 2014). The birth of the Lancang-Mekong Cooperation promotes the joint development of six countries, namely China, Cambodia, Laos, Myanmar, Thailand and Vietnam (Ghoreishi et al., 2023). The California State Water Project, the Colorado River Aqueduct (Lopez, 2018), the Senqu-Vaal transfer in South Africa and Lesotho (Gupta and van der Zaag, 2008), the Snowy Mountains Scheme in southeastern Australia (Pigram, 2000), and other inter-basin water transfer projects have all effectively alleviated water scarcity issues in various regions (Lu et al., 2021).”*  
*(Lines 36-45 in updated manuscript; Lines 37-44 in old version)*

**Comment 3.** Lines 60 – 62: What are the main lacks? You did mention that there a lack in the detailed operation rules, but you did not explain what this/these lack (s) is/are specifically. In addition, what is the main question (s) you want to address in this manuscript? These should be explicit in the introduction.

**Response 3:**

**Thank you for your suggestion. In the updated manuscript, we have detailed the shortcomings of the current operational strategies and segregated this content into a standalone paragraph for a clearer presentation of the main issues that the manuscript aims to address. The revisions are shown as below:**

*“As the project continues to operate, the focus of research should be concentrated on the planning of operational strategies to enhance the sustainability of the project. For IBWT projects, due to regional differences, improving operational efficiency and*

*benefits while ensuring water supply is a challenging task. Currently, most IBWT projects primarily adhere to various laws and policies established by the government. These projects comply with annual water demand plans submitted by sectors like agriculture, domestic use, and ecology. The water supply principle is based on 'prioritizing users that are closer in distance, have lower water supply costs, and have larger water demands' to develop operation strategies. Such method of water diversion results in lower satisfaction levels for users that are farther in distance and have higher costs, leading to an imbalance in water supply and causing some users to face significant pressure from concentrated water deficits. Furthermore, these projects lack annual predictive assessments of local hydrological conditions and fail to develop targeted operational strategies for diverse natural inflows or extreme events. Developing operational strategies without considering the evenness of water deficit and natural inflows is unscientific. This inspires the primary objective of optimization in this paper.” (Lines 65-78 in updated manuscript; Lines 60-62 in old version)*

**Comment 4.** Lines 55 – 86; Lines 87 – 114; I would recommend breaking these long paragraphs in shorter ones, as sometimes hard to follow the main idea you wanted to transmit.

**Response 4:**

**Thank you for your suggestion. We have reorganized the order and content of the mentioned for a clearer logic.**

*“There are considerable studies on the water resources operating strategy of the supply-oriented IBWT projects in terms of social, economic, ecological, and environmental (Gan et al., 2011; Liu and Zheng, 2002; Xu et al., 2013; Zhu et al., 2014). In general, meeting the water demand of various users is the main task of the IBWT project, with the consideration of minimizing water deficit in previous studies (Guo et al., 2020; Wang et al., 2008). Rather than the total amount of water deficit, the crux of the problem may actually be the concentration of water deficit in a certain period of time or region, which has not yet received sufficient attention and remains a major*

challenge. Therefore, both the total and spatial-temporal distribution of water deficit should be considered in the optimization process (Xu et al., 2013). In addition, users' demands and decision makers' benefits should be considered as priorities (Zhang et al., 2012), so minimizing pumped water (PW) is a direct way to reduce costs. *At the same time, the proportion of the amount of abandoned water and the water withdrawn from the river in the process of water diversion should be taken as secondary considerations (Guo et al., 2018). However, due to the data on natural water and user water demand as the determining factors of the operation strategy, and the obvious regional differences, most of the objectives determined by the existing studies can only solve small-scale projects.*

*As the project continues to operate, the focus of research should be concentrated on the planning of operational strategies to enhance the sustainability of the project. For IBWT projects, due to regional differences, improving operational efficiency and benefits while ensuring water supply is a challenging task. Currently, most IBWT projects primarily adhere to various laws and policies established by the government. These projects comply with annual water demand plans submitted by sectors like agriculture, domestic use, and ecology. The water supply principle is based on 'prioritizing users that are closer in distance, have lower water supply costs, and have larger water demands' to develop operation strategies. Such method of water diversion results in lower satisfaction levels for users that are farther in distance and have higher costs, leading to an imbalance in water supply and causing some users to face significant pressure from concentrated water deficits. Furthermore, these projects lack annual predictive assessments of local hydrological conditions and fail to develop targeted operational strategies for diverse natural inflows or extreme events. Developing operational strategies without considering the evenness of water deficit and natural inflows is unscientific. This inspires the primary objective of optimization in this paper.*

*The South-to-North Water Diversion Project (SNWDP) presents a highly complex and dynamic water situation, especially in the Jiangsu section (Vogel et al., 2015). Due to differences in the location and timing of natural inflows and water users, and the*

*mentioned issues in operational strategies, an imbalance in water supply has arisen. At present, there have been some studies attempting to address this issue, but they tend to focus on meeting the total water demand and improving the overall benefits (Li et al., 2017; Zhuan et al., 2016), neglecting the fairness of water supply among different regions. Water supply may become concentrated on a specific user or time period. Therefore, it is of great theoretical significance and practical application value to optimize the existing operation strategy to alleviate the concentration of water deficit so as to realize the comprehensive benefits of the IBWT project (Nazemi and Wheeler, 2015; Peng et al., 2015).” (Lines 50-88 in updated manuscript; Lines 55-114 in old version)*

**Comment 5.** The introduction section provides a lot of information showing some of state-of-the-art studies (which is good), however, it needs to be shortened, and a deep reformulation is required. I would recommend maximum of four or five shorten paragraphs, with the last one being the objectives of this study.

**Response 5:**

**Thank you for your suggestion. We have shortened and restructured the introduction to make the research content of the article more concisely and clearly.**

**The updated Introduction section is shown as follows:**

### ***“1 Introduction***

*Influenced by the impacts of global climate change, human activities, and increasing water demand, issues like regional water resource deficits, flood and drought disasters, and the conflicts between water supply and demand are progressively intensifying (Florke et al., 2018; Kato and Endo, 2017; Ma et al., 2020; Rossi and Peres, 2023). These social issues have become one of the key factors constraining regional and even global sustainable development and environmental protection (Li et al., 2020; Liu et al., 2021; Tian and Destech Publicat, 2017). Inter-basin Water transfer projects have been widely constructed worldwide as an effective way to address water deficit issues caused by uneven distribution of water resources, and improve their utilization*

efficiency (Medeiros and Sivapalan, 2020; Sun et al., 2021; Wei et al., 2022). At least 10 % of the cities worldwide receive water from IBWD projects (McDonald et al., 2014). *The birth of the Lancang-Mekong Cooperation promotes the joint development of six countries, namely China, Cambodia, Laos, Myanmar, Thailand and Vietnam (Ghoreishi et al., 2023).* The California State Water Project, the Colorado River Aqueduct (Lopez, 2018), the Senqu-Vaal transfer in South Africa and Lesotho (Gupta and van der Zaag, 2008), the Snowy Mountains Scheme in southeastern Australia (Pigram, 2000), and other inter-basin water transfer projects have all effectively alleviated water scarcity issues in various regions (Lu et al., 2021). The South-to North Water Diversion Project (SNWDP) in China (Guo and Li, 2012) is considered the largest inter-basin water transfer project in the world. The project runs along numerous water users, and the water resources it provides have already benefited hundreds of millions of people, with even more expected to be served in the future (Pohlner, 2016).

There are considerable studies on the water resources operating strategy of the supply-oriented IBWD projects in terms of social, economic, ecological, and environmental (Gan et al., 2011; Liu and Zheng, 2002; Xu et al., 2013; Zhu et al., 2014). In general, meeting the water demand of various users is the main task of the IBWD project, with the consideration of minimizing water deficit in previous studies (Guo et al., 2020; Wang et al., 2008). Rather than the total amount of water deficit, the crux of the problem may actually be the concentration of water deficit in a certain period of time or region, which has not yet received sufficient attention and remains a major challenge. Therefore, both the total and spatial-temporal distribution of water deficit should be considered in the optimization process (Xu et al., 2013). In addition, users' demands and decision makers' benefits should be considered as priorities (Zhang et al., 2012), so minimizing pumped water (PW) is a direct way to reduce costs. *At the same time, the proportion of the amount of abandoned water and the water withdrawn from the river in the process of water diversion should be taken as secondary considerations (Guo et al., 2018).* However, due to the data on natural water and user water demand as the determining factors of the operation strategy, and the obvious regional differences, most of the objectives determined by the existing studies can only solve small-scale



*projects.*

*As the project continues to operate, the focus of research should be concentrated on the planning of operational strategies to enhance the sustainability of the project. For IBWT projects, due to regional differences, improving operational efficiency and benefits while ensuring water supply is a challenging task. Currently, most IBWT projects primarily adhere to various laws and policies established by the government. These projects comply with annual water demand plans submitted by sectors like agriculture, domestic use, and ecology. The water supply principle is based on 'prioritizing users that are closer in distance, have lower water supply costs, and have larger water demands' to develop operation strategies. Such method of water diversion results in lower satisfaction levels for users that are farther in distance and have higher costs, leading to an imbalance in water supply and causing some users to face significant pressure from concentrated water deficits. Furthermore, these projects lack annual predictive assessments of local hydrological conditions and fail to develop targeted operational strategies for diverse natural inflows or extreme events. Developing operational strategies without considering the evenness of water deficit and natural inflows is unscientific. This inspires the primary objective of optimization in this paper.*

*The South-to-North Water Diversion Project (SNWDP) presents a highly complex and dynamic water situation, especially in the Jiangsu section (Vogel et al., 2015). Due to differences in the location and timing of natural inflows and water users, and the aforementioned issues in operational strategies, an imbalance in water supply has arisen. At present, there have been some studies attempting to address this issue, but they tend to focus on meeting the total water demand and improving the overall benefits (Li et al., 2017; Zhuan et al., 2016), neglecting the fairness of water supply among different regions. Water supply may become concentrated on a specific user or time period. Therefore, it is of great theoretical significance and practical application value to optimize the existing operation strategy to alleviate the concentration of water deficit so as to realize the comprehensive benefits of the IBWT project (Nazemi and Wheeler, 2015; Peng et al., 2015).*

*To address the above problem, this paper studies the Jiangsu section of South-to-North Water Diversion project (J-SNWDP). The three main contributions of this paper are as follows: (1) The definition of the Water Deficit Evenness Index (WDEI) and its incorporation into the joint optimal operation model of the J-SNWDP, along with the Total Water Deficit (TWD) and the Pumped Water (PW), aim to satisfy the requirements of both decision-makers and users; (2) The incorporation of the amount of abandoned water and the water withdrawn from the Yangtze River into the decision indicator set, along with the application of the multi-attribute decision making method for filtering the Pareto front strategies of NSGA-III, results in the identification of the optimal operation strategy that balances economic and ecological benefits; (3) The comparison of the optimal operation strategy selected in three typical years (wet, normal, and dry) with the historical operation strategy under identical natural conditions in the paper serves to verify the superiority of the optimization results, offering reasonable optimization suggestions for the J-SNWDP and other similar regions.” (Lines 31-100 in updated manuscript; Lines 31-127 in old version)*

**Comment 6.** Lines 126 – 127 are not necessary, however, I would recommend including a flowchart figure in the methodology section, showing which steps were required to implement this methodology, since the data gathering to the model/index approach execution.

**Response 6:**

**Thank you for your suggestion. We have removed lines 126-127 and replaced Figure 4 in the "Methods" section with a flowchart showing the complete optimization process. The revisions are shown as follows:**

“

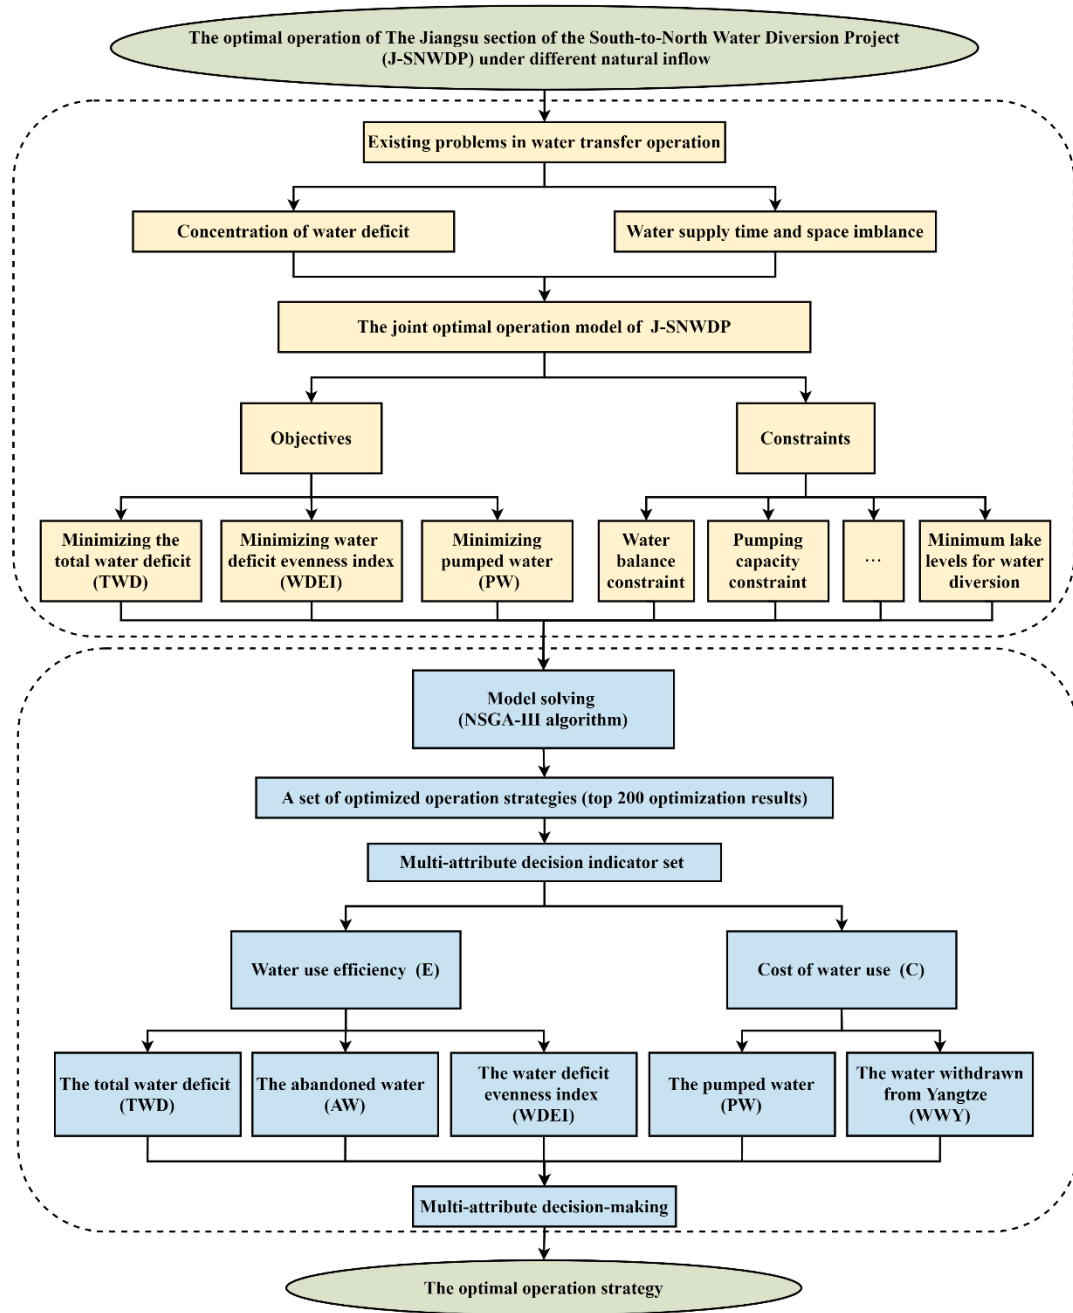

**Fig. 4. Optimization process of the Jiangsu section of the South-to-North Water Diversion Project (J-SNWDP).” (Lines 272-274 in updated manuscript; Lines 277-279 in old version)**

## **Methodology**

**Comment 7.** Figure 1: All the symbols in Figure 1 should be in the legend. It is a good idea to color the legends from each line (makes it easier to understand for the reader), but the symbols should be included as well, for example, the pumping and city symbols. In addition, what is the green line in the map? The coordinates from the left and top should be removed as they are just repeating information. In addition, I would make a zoom out of China, or maybe creating another box locating China in Asia continent, as although China's locations is well known, it is always good to include a broader map of the country we are studying.

### **Response 7:**

**Thank you for your suggestion. We have removed the duplicate coordinates in the Fig. 1 and added the symbols legend. In addition, the inset in the upper right corner has been changed to a geographic divisional map of Asia to show China's relative position in Asia. The green line in the figure indicates the West Route of the two water transmission routes. To avoid any confusion, we have added the legend of the green, orange and purple lines in the figure.**

“

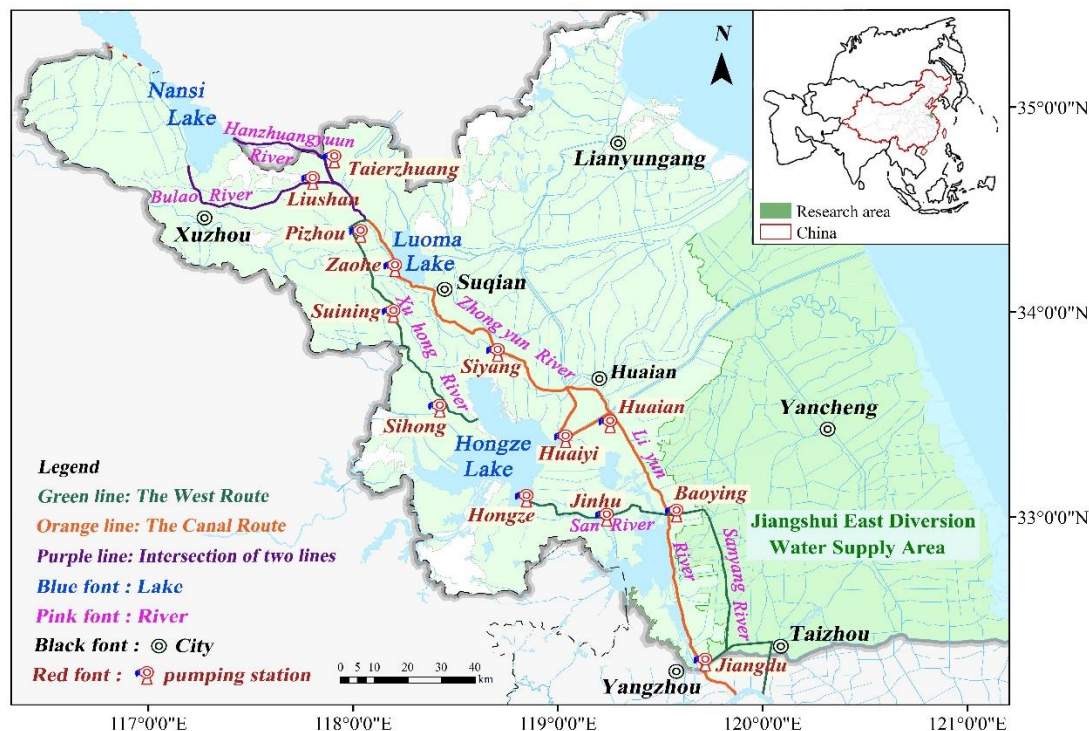

**Fig. 1. The Jiangsu section of the South-to-North Water Diversion Project (J-SNWDP). The orange, green and purple lines represent the Canal Route, the West Route, and intersection of the two routes to transport water outside the province, respectively.” (Lines 143-146 in updated manuscript; Lines 170-173 in old version)**

**Comment 8.** Figure 3: I would suggest to change the color of the normal years to black, and the dry years to red, as it makes easier for the reader to follow. I would also recommend changing the range of the Monthly mean inflow in Hongze Lake (a) to 0, 100, and 200, in Luoma Lake (b) to 0, 25, and 50, in Nansi Lake (c) to 0, 1, and 2, respectively, that way your graphs would be cleaner. The Monthly mean average dots should be bigger as we can barely see them in the graphs.

**Response 8:**

**Thank you for your suggestion. We have revised and updated the range of the Monthly mean inflow, the color of the lines, and the size of the Monthly mean average dots. The revisions are shown as follows:**

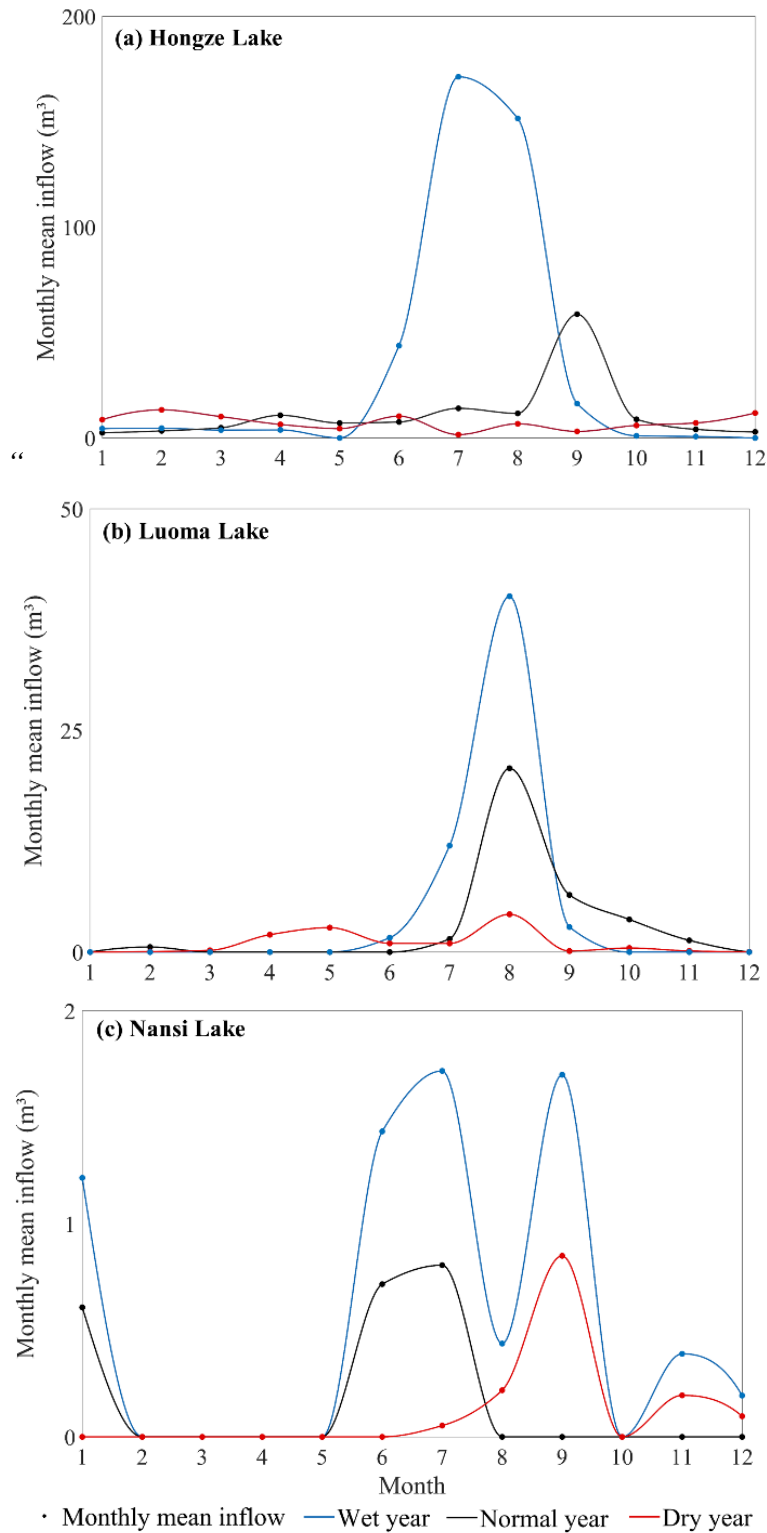

**Fig. 3. Monthly mean inflow curves of the (a) Hongze, (b) Luoma, and (c) Nansi lakes in typical wet, normal, and dry years.” (Lines 160-164 in updated manuscript; Lines 187-191 in old version)**

**Comment 9.** Line 194: “The issue is particularly severe here.” Here where?

**Response 9:**

**The problem here refers to the complex situation of multiple users, where the concentration of water deficits due to uneven water supply is particularly problematic. To avoid confusion, we have modified the statement in section 2.2.**

*“For IBWT projects, issues of equitable water supply often arise, especially for projects like the J-SNWDP, which has 13 water users along its route. Different users have significant spatial variations in location, as well as large differences in water supply costs. Consequently, the concentration of water deficits is particularly severe when there are multiple users, which results in some of them being stressed by water deficits.”*

*(Lines 166-170 in updated manuscript; Lines 193-194 in old version)*

**Comment 10.** Line 208: Where are the symbols meaning for Equation 1? As well as for the other used equations? Every equation should come with the meaning of each used symbol right after the equation.

**Response 10:**

**Thank you for your suggestion. We have added the symbols meanings right after all equations to avoid any confusion. The revisions are shown as follows:**

*“By incorporating the WDEI index into the optimization objective and minimizing it, the difference in water shortage can be reduced as much as possible. So the WDEI is below:*

$$WDEI = \frac{\sum_{t=1}^n \left( QR(i,t) - \frac{\sum_{i=1}^n QR(i,t)}{n} \right)^2}{n}, \quad (1)$$

*where  $QR(i, t)$  is the water deficit of the  $i$  th user at time step  $t$ ,  $i= 1, 2, \dots, n$ , with  $n$  being the total number of users ( $n= 13$  in this study),  $t= 1, 2, \dots, T$ , with  $T$  being the whole operating period.*

### 2.3 The joint optimal operation model of J-SNWDP

Herein, the joint optimal operating model of the J-SNWDP was constructed with 228 decision variables (13 pumping stations and 6 sluices). The objective function and associated constraints are formulated as follows.

#### 2.3.1 Objectives

(1) Minimizing the total water deficit (TWD)

TWD is a measure of how well the operation strategy completion is being implemented. This objective aims to minimize the total amount of water deficit at the end of a given operation period, potentially improving the satisfaction of water demand for users and increasing the operation strategy completion.

$$TWD = \min \sum_{t=1}^T \sum_{i=1}^n QR(i,t), \quad (2)$$

where  $QR(i, t)$  is the water deficit of the  $i$  th user at time step  $t$ ,  $i = 1, 2, \dots, n$ , with  $n$  being the total number of users ( $n = 13$  in this study),  $t = 1, 2, \dots, T$ , with  $T$  being the whole operating period.

(2) Minimizing water deficit evenness index (WDEI)

WDEI indicates the degree of concentration of the water deficit and can be used as an indicator of the uniformity of water diversion. The lower the WDEI, the better the strategy is.

$$WDEI = \min \frac{\sum_{t=1}^n (QR(i,t) - \frac{\sum_{i=1}^n QR(i,t)}{n})^2}{n}, \quad (3)$$

where  $QR(i, t)$  is the water deficit of the  $i$  th user at time step  $t$ ,  $i = 1, 2, \dots, n$ , with  $n$  being the total number of users ( $n = 13$  in this study),  $t = 1, 2, \dots, T$ , with  $T$  being the whole operating period.

(3) Minimizing pumped water (PW)

PW reflects the economy of operation strategy. The lower the PW is, the less the operating costs.

$$PW = \min \sum_{t=1}^T \sum_{p=1}^P QS(p,t), \quad (4)$$



where  $QS(p, t)$  is the water pumped by the  $p$  th pumping station at time step  $t$ ,  $p= 1, 2, \dots, P$ , with  $P$  is the total number of pumping stations ( $P= 13$  in this study).

### 2.3.2 Constraints

Systems operation should obey operating rules and physical constraints, such as water balance, pumping capacity, and lake storage constraints. The mathematical expressions of the constraints are shown as below.

#### (1) Water balance constraint

The water balance constraint should be satisfied in the water diversion process.

$$V(i, t+1) = V(i, t) + Q(i, t) + DI(i, t) + PC(i+1, t) - DO(i, t) - W_1(i, t) - PR(i, t), \quad (5)$$

At time step  $t$ , where  $V(i, t)$  is the water storage of the  $i$  th lake at time step  $t$ ;  $Q(i, t)$  is the inflow of the  $i$  th lake;  $W_1(i, t)$  is the water demand of the  $i$  th lake (water to be supplemented by SNWD project after deducting the locally available water);  $DO(i, t)$  is water diversion to the north from the  $i$  th lake;  $DI(i, t)$  is the water pumped into the  $i$  th lake;  $PC(i, t)$  is the water discharged into the  $i$  th lake;  $PR(i, t)$  is the water discharged from the  $i$  th lake.

#### (2) Pumping capacity constraint

$$\begin{aligned} 0 \leq DO(i, t) \leq DO_{\max}(i, t) \\ 0 \leq DI(i, t) \leq DI_{\max}(i, t) \end{aligned} \quad (6)$$

At time step  $t$ , where  $DO(i, t)$  is water diversion to the north from the  $i$  th lake;  $DI(i, t)$  is the water pumped into the  $i$  th lake;  $DO_{\max}(i, t)$  is the maximum pumping capacity that is pumped into the  $i$  th lake;  $DI_{\max}(i, t)$  is the maximum pumping capacity that is diverted north from the  $i$  th lake.

#### (3) Sluice capacity constraint

$$0 \leq PR(i, t) \leq PR_{\max}(i, t), \quad (7)$$

where  $PR(i, t)$  is the water discharged from the  $i$  th lake;  $PR_{\max}(i, t)$  is the maximum sluice capacity at time step  $t$ .

#### (4) Lake storage constraint

$$V_{\min}(i, t) \leq V(i, t) \leq V_{\max}(i, t), \quad (8)$$

where  $V(i, t)$  is the water storage of the  $i$  th lake at time step  $t$ ;  $V_{\min}(i, t)$  and  $V_{\max}(i, t)$

are the minimum and maximum water storage capacities at time step  $t$ , respectively. When  $V(i, t) < V_{min}(i, t)$  is water deficit,  $QR(i, t) = V_{min}(i, t) - V(i, t)$ , ensure that the lake level is above the limit level; when  $V(i, t) > V_{max}(i, t)$  is abandoned water, ensure that the water storage of the lakes is within a reasonable range.

(5) Minimum lake levels for water diversion

$$Z_{min}(i, t) \leq Z(i, t) \leq Z_{max}(i, t), \quad (9)$$

where  $Z(i, t)$  is the level of the  $i$  th lake at time step  $t$ ;  $Z_{min}(i, t)$  and  $Z_{max}(i, t)$  are the minimum and maximum level of the  $i$  th lake at time step  $t$ , respectively.” (Lines 181-241 in updated manuscript; Lines 206-258 in old version)

**Comment 11.** Figure 4: I would recommend using the standard flowchart boxes/symbols. For example, rectangles means a “process”, circle means a “terminal”, and so on. That makes easier for the reader to understand what has been done in each step. This recommendation should also be applied to the recommended flowchart and for Figure 2.

**Response 11:**

Thank you for your suggestion. To avoid duplication and confusion, we have modified Figure 4 to include the original content of the complete optimization process flowchart, which can be found in the Response 6.

Similarly, we have modified Figure 2. The reason why the lakes are all represented as circles with no absolute “terminal” in Figure 2 is that there is an exchange of water between the lakes.

“

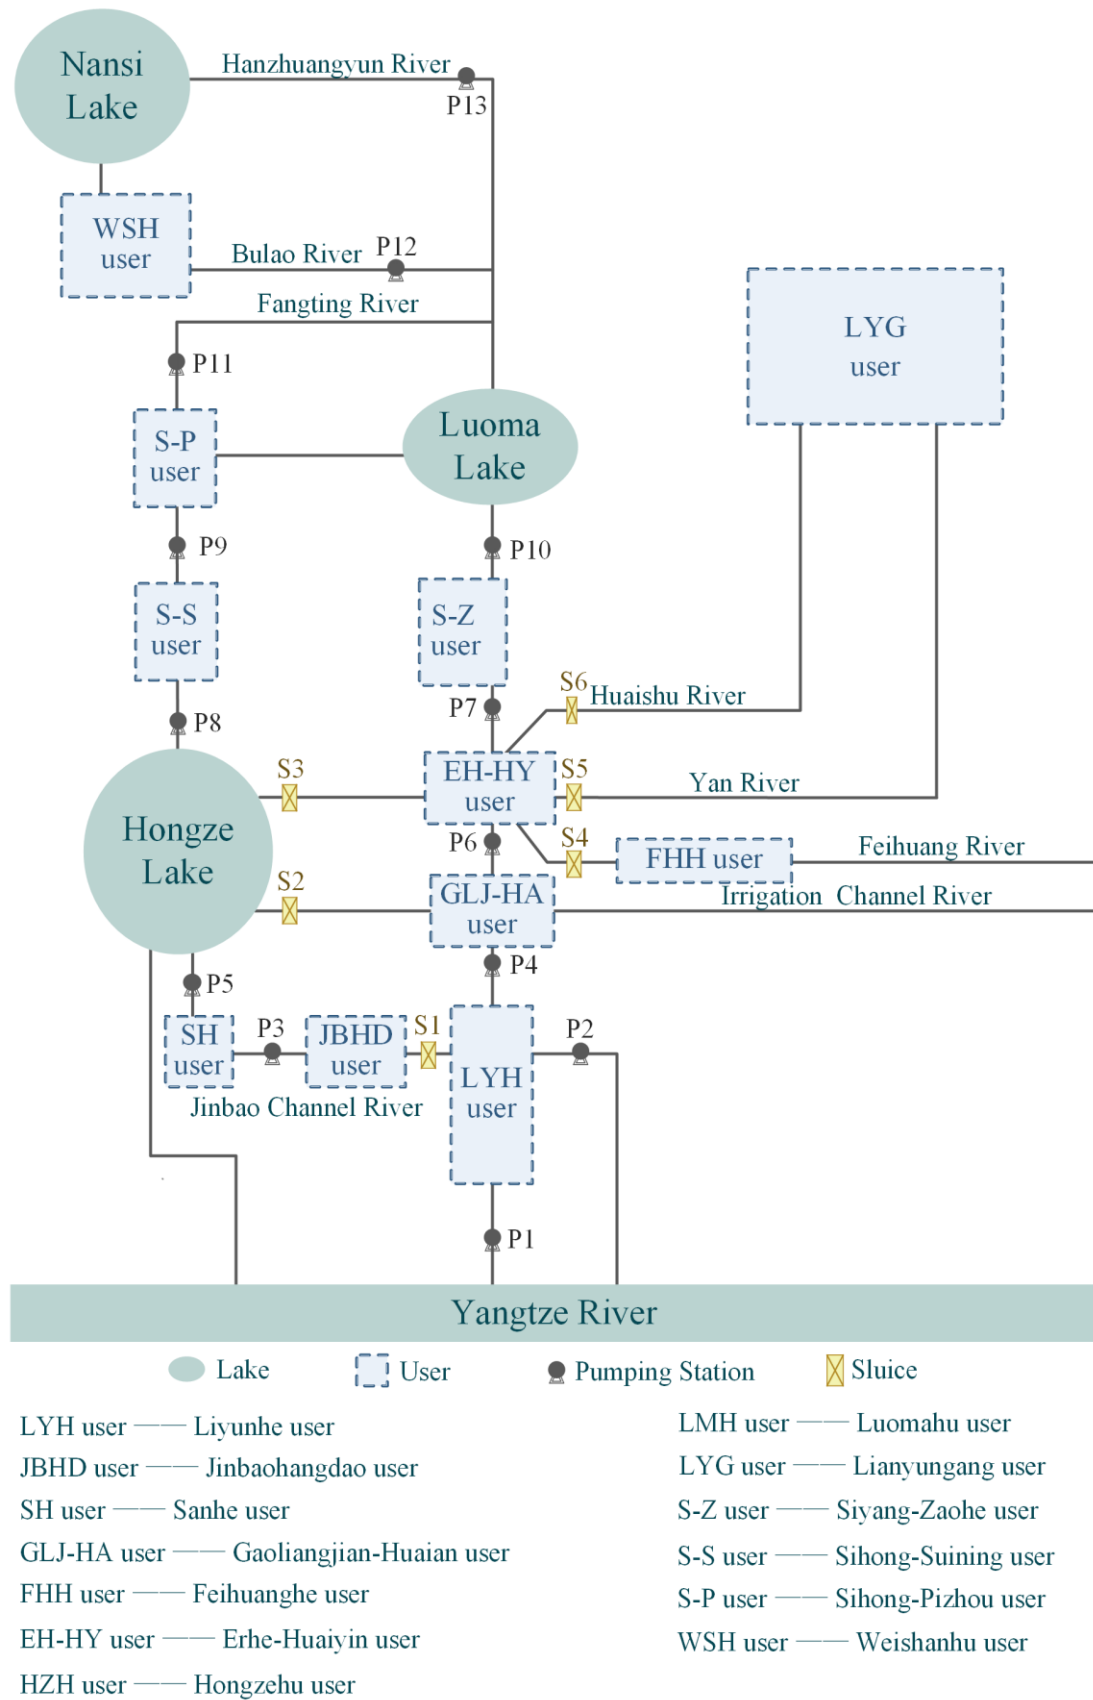

**Fig. 2. Schematic diagram of the Jiangsu section of the South-to-North Water Diversion Project.” (Lines 147-148 in updated manuscript; Lines 174-175 in old**

*version)*

## **Results/Discussion**

**Comment 12.** Although your results showed to be very aligned with the necessities of one of China's water transboundary systems, was this methodology used elsewhere? If not, would it be possible to apply this methodology to other similar water transfer systems? Which would be the main concerns in applying this method in other locations? On top of that, what are the main uncertainties of this method? I mean, although your results showed a high confidence, I think there are some concerns in this methodology that should be considered and discussed.

### **Response 12:**

**Thank you for your suggestions. Regarding the optimization objectives of this paper, the introduction highlights that the total water deficit and the pumping water are commonly used as optimization objectives in domestic and international discussion on inter-basin water transfer projects. However, the evenness of water deficit in this paper is rarely studied. Methodologically, the NSGA-III algorithm used in this paper is commonly employed as a solution method for solving models, and multi-attribute decision-making methods are often applied in indicator evaluation. Using this combination results is an innovative way to select the optimal operation strategies in a more scientific way.**

**The distribution of water resources varies significantly worldwide, and the concentration of water deficit is a prevalent and pressing issue that needs to be addressed in water-deficient areas. In addition to focusing on reducing the total water deficit, it is important to balance the allocation among water users to prevent the concentration of water deficit pressure in certain users. Therefore, we believe this method could be applied to other similar water transfer systems. When adapting it to different regions, a through exploration of local natural inflow patterns, topography, societal water demands, and economic development is essential to develop tailored optimal operation strategies.**

**For the main sources of uncertainty in the method, we have provided a detailed explanation in the "Sources of Uncertainty" section of this paper (see Response**

**13), which highlights the concerns in this methodology that should be considered and discussed, as well as future research directions.**

**Comment 13.** Please add a new section regarding the “Sources of Uncertainty” as they were not so clear in the discussion section. The objective of this section is an auto critique of your own work, showing its limitations and it can be improved. No work is so perfect that can’t show any limitations, please rethink about the main uncertainties and write this section.

**Response 13:**

**Thanks to your suggestion. We added a "Sources of Uncertainty" section to the limitations and areas for improvement of our study. The revisions are shown as follows:**

*“5 Sources of Uncertainty*

*This paper proposes an optimal operation strategy that considers the evenness of water deficit, accounting for the hydrological conditions of three typical years (i.e., wet years, normal years, and dry years). The strategy can generally alleviate the concentration of water deficit under most natural inflow conditions. However, due to the impact of global climate change, future runoff is highly uncertain, necessitating further discussion. Moreover, the Eastern Route of the South-to-North Water Diversion Project is a large-scale inter-basin water transfer project that spans provinces such as Jiangsu and Shandong, and it involves numerous uncertain factors. These include changes in biological communities, hydrological variations, and dynamic changes in water demand caused by extreme events, all of which add complexity to determining the water supply capacity of the project.*

*Regarding the two major regulating reservoirs within Jiangsu, Hongze and Luoma Lakes, the operational control water levels used in this paper were approved and established by the Ministry of Water Resources of China in 1954. Over the years, with socio-economic development, changes in the South-to-North Water Diversion Project, and the flood control capabilities of the lakes themselves, the original flood limit water*

*levels have become inadequate for current development needs. This paper proposes the idea of appropriately raising the flood limit water levels of the lakes during the flood season, but the specific values require further research, incorporating runoff forecasting, flood risk early warning, and other factors into future studies of inter-basin water transfer.*

*Furthermore, this paper places greater emphasis on the positive impacts of inter-basin water transfer on social demands and ecology, with less focus on the analysis of economic costs. Due to the variability in water prices across different regions and the ongoing changes in economic development in recent years, the cost of the project is currently represented by the volume of water pumped and has not been converted into actual cost prices. Future studies will delve into the dynamic adjustment mechanisms of water pricing, subsequently analyzing the economic benefits of the project.” (Lines 460-483 in updated manuscript)*

**Comment 14.** In the discussion section, I would also recommend adding some statements showing the costs to implement and maintain the inter-basin water transfer, showing how much it is (in average) to install in China and comparing/discussing with other system worldwide (values in American dollar).

**Response 14:**

**Thank you for your suggestion. We have added a comparison of the costs of various inter-basin water transfer projects at the beginning of the discussion section to highlight the complexity and representativeness of the study area.**

*“Inter-basin water transfer projects are widely used around the world and are also quite costly to construct. For instance, the Colorado River aqueduct cost approximately 3.5 billion dollars (Witcher, 2017), the Australian Snowy Mountains Scheme was completed in 1974 at a cost of about 500 million dollars (Pigram, 2000), and the South-to-North Water Diversion Project in China, as the largest and most expensive inter-basin water transfer system in the world, is projected to cost 62 billion dollars (Markosov, 2014). The installation and operation maintenance costs are also*

*significantly high. Of this, the investment for just the Eastern Route of the project is around 1 billion dollars (Liu et al., 2022), which is a typical example of a vast and complex water transfer system and has certain representativeness. Therefore, the Jiangsu section of the Eastern Route of the South-to-North Water Diversion Project is selected as the study area for this paper.” (Lines 418-427 in updated manuscript)*

**Comment 15.** Another questions arise for the discussion section:

How many years did it last to be build? How many years it is expected to work? What are the main trade-offs (e.g., environment impacts; positives and negatives for the biota; how the local hydrology will be changed; how many energy is used to pump the water in the whole system; etc.) of this kind of system?

**Response 15:**

**Thanks to your suggestion. The Eastern Route of the South-to-North Water Diversion Project (SNWDP) commenced construction in 2002 (Zhou et al., 2023). It officially began operation in 2013 (Wu et al., 2018) and has been in operation for 10 years to date, with a designed service life of 100 years. Since the 1950s, considering the severe water deficit in the northern regions and the urgent social needs, coupled with the Yangtze River in the southern region owning abundant water resources, the Chinese government invested significant efforts in planning the SNWDP, which is also of great importance in the project's construction.**

**The transfer of water resources also alters hydrological conditions and the characteristics of local water bodies, thus affecting the environment and ecology accordingly. In the early stages of construction, experts conducted rational and scientific water withdrawal assessments to ensure the minimization of negative environmental impacts due to the construction and operation of the project. As the project gradually enters the stable operational phase, it has been observed that water diversion has a significant positive effect on improving water quality and reducing sedimentation in the Yangtze River. (Yang et al., 2001; Zhang et al., 2022) Regarding the issue of energy consumption, the Middle Route of the SNWDP**

diverts water from the Danjiangkou Reservoir to Beijing and Tianjin through a newly excavated canal using gravity-driven water method, which eliminate the need for pumping and resulting in relatively low energy consumption. The East Route pumps water from Jiangsu to Shandong through 13 levels of pumping stations, and then it is gravity-driven from Shandong to Tianjin. The energy consumption generated by water pumping can be minimized through optimized scheduling (Liu et al., 2023). The reduction in pumping volume in the research results indirectly indicates an effective decrease in water pumping and relative energy costs.

**Comment 16.** Are isolated communities allowed to use this transferred water where the transboundary system flows? If not, how this issue would be addressed?

**Response 16:**

Thank you for presenting an interesting question. Recently, we have consulted with relevant departments of the Eastern Route of the SNWDP and investigated relevant information to conduct research on the issue.

Firstly, the division of the water users within Jiangsu Province by this project almost covers all cities, towns and villages. The allocation of water includes multiple water-using sectors such as agriculture, industry, domestic, navigation, and ecology. The annual water demand plans for each user and the water supply plans for the project are jointly formulated by the Ministry of Water Resources of China and the department of Water Resources of Jiangsu Province, which essentially ensure the water demands of all sectors of society, thus there are seldom isolated communities.

Furthermore, regarding water abstraction and usage issues, the Jiangsu section of the SNWDP is under regulation by the Jiangsu Provincial Government and the Water Resources Department. To ensure the rational use of water resources, the abstraction of water must follow a strict approval process. All the pumping stations along the route are monitored by dedicated personnel, and regular inspections are arranged. Even if there are isolated communities, unauthorized



**abstraction of water is not permitted in legal.**

**Comment 17.** Are there any conflicts between two communities (i.e., the one that is providing the water and the one that is receiving this resource)?

**Response 17:**

**The primary water sources (i.e., the providing communities) for inter-basin water transfer projects are mostly rivers or lakes with abundant water supplies. The process of diverting water from the providing communities to the receiving communities inevitably impacts the existing social and ecological balance. Considering the large scale of inter-basin water transfer projects and their impact on diverse natural and social conditions, the timing and volume of transfers undergo strict government deliberation to balance the water demands of receiving communities with minimal impact on all involved areas. Moreover, we have considered the water deficit evenness and inter-basin water transfers based on the principle of sharing the risk of water deficit in this paper. This approach also aims to prevent severe consequences caused by significant water deficits in a small area and to minimize potential conflicts between the supply and receiving communities.**

## Conclusion

**Comment 18.** I suggest joining all points in the conclusion section. In my opinion it makes this section more “fluid” and easier to read. In addition, some recommendations for future work need to be included, for example, the application of this method in other similar watersheds worldwide in order to revalidate this method in other circumstances. Overall, the work is very good, it just needs more discussion and some explanations, as I included in the review. The writing is also fine and formal.

### Response 18:

**Thank you for your suggestion. We have revised the conclusion and added content regarding the broader application of the method in similar studies and future works. The updated Conclusions are shown as follows:**

#### *“5 Conclusions*

*Scientific operational decisions in inter-basin water transfer projects are important for improving the water allocation balance and reducing the stress of concentrated water deficits. As the largest and most heavily invested inter-basin water transfer project in the world, the South-to-North Water Transfer Project, has been selected as the research area for this paper, focusing specifically on the Jiangsu section.*

*(1) From the perspectives of social demand, economy and ecology, this paper establishes a joint optimal operation model for the Jiangsu section of the South-to-North Water Diversion Project (J-SNWDP), and further uses a combination of NSGA-III algorithm and multi-attribute decision-making for strategy preference, which has a certain persuasion. This method has a good performance in solving the complex water transfer problems with multiple objectives and engineering units, and is currently less applied.*

*(2) After incorporating the Water Deficit Evenness Index into the model, the concentration of water deficit is reduced by 94.2% (81.8 %, 76.7%) in typical wet years (normal year and dry year) compared with the historical strategy, which greatly ameliorated the engineering problem of user water deficit concentration. The other two indicators of the model, total water deficit (TWD) and pumping water (PW), were*

reduced by 82.1% (37.7%, 52.4%) and 45.1% (3.2%, 21.5%), respectively, with excellent performance.

*(3) After optimization, the rising trend of water level in Hongze Lake and Luoma Lake reflects the enhanced storage capacity of the lake, and the water allocation between different water transmission routes is more balanced, which improves water utilization and water supply efficiency. Moreover, this paper proposes water transfer prioritization rules and suggests appropriately increasing the flood control limit water level, aimed at protecting the water diversion and enhancing operational efficiency. The sources of uncertainty, such as natural inflow and societal water demand, are worthy of further study.*

*Overall, the successful application of the optimal operation strategy in the Jiangsu section of the South-to-North Water Transfer Project also demonstrates the feasibility of the research. It is hoped that this method can be attempted in other similar watersheds worldwide in order to revalidate this method in other circumstances, demonstrate its universality. This would provide the scientific basis and operating suggestions for the inter-basin water diversion project.” (Lines 484-513 in updated manuscript; Lines 452-471 in old version)*

## Reference

- Florke, M., Schneider, C., McDonald, R.I., 2018. Water competition between cities and agriculture driven by climate change and urban growth. *Nature Sustainability* 1, 51-58. <http://dx.doi.org/10.1038/s41893-017-0006-8>
- Gan, Z.G., Zhao, H.L., Jiang, Y.Z., You, J.J., Kang, J., 2011. River Basin Water Resources Multi- Objective Regulation Theory And Method Research. *GBMCE* 2011 71-78. <http://dx.doi.org/10.4028/www.scientific.net/AMM.71-78.4721>
- Ghoreishi, M., Elshorbagy, A., Razavi, S., Bloeschl, G., Sivapalan, M., Abdelkader, A., 2023. Cooperation in a transboundary river basin: a large-scale socio-hydrological model of the Eastern Nile. *Hydrology and Earth System Sciences* 27, 1201-1219. <http://dx.doi.org/10.5194/hess-27-1201-2023>
- Guo, X.Y., Ma, C., Tang, Z.B., 2018. Multi-Timescale Joint Optimal Dispatch Model Considering Environmental Flow Requirements for a Dewatered River Channel: Case Study of Jinping Cascade Hydropower Stations. *Journal of Water Resources Planning and Management* 144. [http://dx.doi.org/10.1061/\(asce\)wr.1943-5452.0000981](http://dx.doi.org/10.1061/(asce)wr.1943-5452.0000981)
- Guo, Y.C., Li, J.L., 2012. Practice and Improvement of Agent Construction System in Hydraulic Engineering, 2nd International Conference on Civil Engineering and Transportation (ICCET 2012), Guilin, PEOPLES R CHINA, pp. 2611-2615.
- Guo, Y.X., Tian, X., Fang, G.H., Xu, Y.P., 2020. Many-objective optimization with improved shuffled frog leaping algorithm for inter-basin water transfers. *Advances in Water Resources* 138. <http://dx.doi.org/10.1016/j.advwatres.2020.103531>
- Gupta, J., van der Zaag, P., 2008. Interbasin water transfers and integrated water resources management: Where engineering, science and politics interlock. *Physics and Chemistry of the Earth* 33, 28-40. <http://dx.doi.org/10.1016/j.pce.2007.04.003>
- Kato, T., Endo, A., 2017. Contrasting Two Dimensions of Disaster-Induced Water-Shortage Experiences: Water Availability and Access. *Water* 9. <http://dx.doi.org/10.3390/w9120982>
- Li, J.H., Lei, X.H., Qiao, Y., Kang, A.Q., Yan, P.R., 2020. The Water Status in China and an Adaptive Governance Frame for Water Management. *International Journal of Environmental Research and Public Health* 17. <http://dx.doi.org/10.3390/ijerph17062085>
- Li, Y.Y., Cui, Q., Li, C.H., Wang, X., Cai, Y.P., Cui, G.N., Yang, Z.F., 2017. An improved multi-

- objective optimization model for supporting reservoir operation of China's South-to-North Water Diversion Project. *Science of the Total Environment* 575, 970-981.  
<http://dx.doi.org/10.1016/j.scitotenv.2016.09.165>
- Liu, C.M., Zheng, H.X., 2002. South-to-north water transfer schemes for China. *International Journal of Water Resources Development* 18, 453-471.  
<http://dx.doi.org/10.1080/0790062022000006934>
- Liu, D.C., Li, Y., Wang, P.F., Zhong, H.Q., Wang, P., 2021. Sustainable Agriculture Development in Northwest China Under the Impacts of Global Climate Change. *Frontiers in Nutrition* 8. <http://dx.doi.org/10.3389/fnut.2021.706552>
- Liu, Y., Chong, F.T., Jia, J.J., Cao, S.L., Wang, J., 2022. Proper Pricing Approach to the Water Supply Cost Sharing: A Case Study of the Eastern Route of the South to North Water Diversion Project in China. *Water* 14. <http://dx.doi.org/10.3390/w14182842>
- Liu, Y.Y., Zheng, H., Wan, W.H., Zhao, J.S., 2023. Optimal operation toward energy efficiency of the long-distance water transfer project. *Journal of Hydrology* 618.  
<http://dx.doi.org/10.1016/j.jhydrol.2023.129152>
- Lopez, J.C., 2018. Interbasin water transfers and the size of regions: An economic geography example. *Water Resources and Economics* 21, 40-54.  
<http://dx.doi.org/10.1016/j.wre.2017.10.005>
- Lu, Y., Tian, F.Q., Guo, L.Y., Borzì, I., Patil, R., Wei, J., Liu, D.F., Wei, Y.P., Yu, D.J., Sivapalan, M., 2021. Socio-hydrologic modeling of the dynamics of cooperation in the transboundary Lancang-Mekong River. *Hydrology and Earth System Sciences* 25, 1883-1903.  
<http://dx.doi.org/10.5194/hess-25-1883-2021>
- Ma, T., Sun, S., Fu, G.T., Hall, J.W., Ni, Y., He, L.H., Yi, J.W., Zhao, N., Du, Y.Y., Pei, T., Cheng, W.M., Song, C., Fang, C.L., Zhou, C.H., 2020. Pollution exacerbates China's water scarcity and its regional inequality. *Nature Communications* 11.  
<http://dx.doi.org/10.1038/s41467-020-14532-5>
- Markosov, A.I., 2014. Does Transferring Water Present an Efficient Way of Solving Water Scarcity in China's Northeast?
- McDonald, R.I., Weber, K., Padowski, J., Florke, M., Schneider, C., Green, P.A., Gleeson, T., Eckman, S., Lehner, B., Balk, D., Boucher, T., Grill, G., Montgomery, M., 2014. Water on an

urban planet: Urbanization and the reach of urban water infrastructure. *Global Environmental Change-Human and Policy Dimensions* 27, 96-105.

<http://dx.doi.org/10.1016/j.gloenvcha.2014.04.022>

Medeiros, P., Sivapalan, M., 2020. From hard-path to soft-path solutions: slow-fast dynamics of human adaptation to droughts in a water scarce environment. *Hydrological Sciences Journal- Journal Des Sciences Hydrologiques* 65, 1803-1814.

<http://dx.doi.org/10.1080/02626667.2020.1770258>

Nazemi, A., Wheatler, H.S., 2015. On inclusion of water resource management in Earth system models - Part 2: Representation of water supply and allocation and opportunities for improved modeling. *Hydrology and Earth System Sciences* 19, 63-90. <http://dx.doi.org/10.5194/hess-19-63-2015>

Peng, Y., Chu, J.G., Peng, A.B., Zhou, H.C., 2015. Optimization Operation Model Coupled with Improving Water-Transfer Rules and Hedging Rules for Inter-Basin Water Transfer-Supply Systems. *Water Resources Management* 29, 3787-3806.

<http://dx.doi.org/10.1007/s11269-015-1029-4>

Pigram, J.J., 2000. Options for rehabilitation of Australia's Snowy River: An economic perspective. *Regulated Rivers-Research & Management* 16, 363-373.

[http://dx.doi.org/10.1002/1099-1646\(200007/08\)16:4<363::Aid-rrr610>3.0.Co;2-i](http://dx.doi.org/10.1002/1099-1646(200007/08)16:4<363::Aid-rrr610>3.0.Co;2-i)

Pohlner, H., 2016. Institutional change and the political economy of water megaprojects: China's south-north water transfer. *Global Environmental Change-Human and Policy Dimensions* 38, 205-216. <http://dx.doi.org/10.1016/j.gloenvcha.2016.03.015>

Rossi, G., Peres, D.J., 2023. Climatic and Other Global Changes as Current Challenges in Improving Water Systems Management: Lessons from the Case of Italy. *Water Resources Management* 37, 2387-2402. <http://dx.doi.org/10.1007/s11269-023-03424-0>

Sun, S., Zhou, X., Liu, H.X., Jiang, Y.Z., Zhou, H.C., Zhang, C., Fu, G.T., 2021. Unraveling the effect of inter-basin water transfer on reducing water scarcity and its inequality in China. *Water Research* 194. <http://dx.doi.org/10.1016/j.watres.2021.116931>

Tian, H.G., Destech Publicat, I., 2017. Research on Scientific Development Strategy of Water Conservancy Economy Based on Sustainable Development, 3rd International Conference on Social Science, Management and Economics (SSME), Guangzhou, PEOPLES R CHINA, pp.

476-481.

Vogel, R.M., Lall, U., Cai, X.M., Rajagopalan, B., Weiskel, P.K., Hooper, R.P., Matalas, N.C., 2015. Hydrology: The interdisciplinary science of water. *Water Resources Research* 51, 4409-4430. <http://dx.doi.org/10.1002/2015wr017049>

Wang, L.Z., Fang, L.P., Hipel, K.W., 2008. Basin-wide cooperative water resources allocation. *European Journal of Operational Research* 190, 798-817. <http://dx.doi.org/10.1016/j.ejor.2007.06.045>

Wei, Y.P., Wei, J., Li, G., Wu, S.L., Yu, D., Ghoreishi, M., Lu, Y., Souza, F.A.A., Sivapalan, M., Tian, F.Q., 2022. A socio-hydrological framework for understanding conflict and cooperation with respect to transboundary rivers. *Hydrology and Earth System Sciences* 26, 2131-2146. <http://dx.doi.org/10.5194/hess-26-2131-2022>

Witcher, T.R., 2017. The Colorado River Aqueduct. *Civil Engineering* 87, 46-49. <http://dx.doi.org/10.1061/ciegag.0001187>

Wu, Y., Dai, R., Xu, Y.F., Han, J.G., Li, P.P., 2018. Statistical Assessment of Water Quality Issues in Hongze Lake, China, Related to the Operation of a Water Diversion Project. *Sustainability* 10. <http://dx.doi.org/10.3390/su10061885>

Xu, J.P., Tu, Y., Zeng, Z.Q., 2013. Bilevel Optimization of Regional Water Resources Allocation Problem under Fuzzy Random Environment. *Journal of Water Resources Planning and Management* 139, 246-264. [http://dx.doi.org/10.1061/\(asce\)wr.1943-5452.0000248](http://dx.doi.org/10.1061/(asce)wr.1943-5452.0000248)

Yang, S.L., Ding, P.X., Chen, S.L., 2001. Changes in progradation rate of the tidal flats at the mouth of the Changjiang (Yangtze) River, China. *Geomorphology* 38, 167-180. [http://dx.doi.org/10.1016/s0169-555x\(00\)00079-9](http://dx.doi.org/10.1016/s0169-555x(00)00079-9)

Zhang, C., Wang, G.L., Peng, Y., Tang, G.L., Liang, G.H., 2012. A Negotiation-Based Multi-Objective, Multi-Party Decision-Making Model for Inter-Basin Water Transfer Scheme Optimization. *Water Resources Management* 26, 4029-4038. <http://dx.doi.org/10.1007/s11269-012-0127-9>

Zhang, T., Yang, G., Zhang, J., Wang, P., Chen, Y., Zeng, F., 2022. Changes in the Quality of Water Flowing Through the First Phase of the Eastern Route of the South-to-North Water Transfer Project. *Journal of Hydroecology* 43, 8-15.

Zhou, Y.Q., Chen, L.L., Zhou, L., Zhang, Y.L., Peng, K., Gong, Z.J., Jang, K.S., Spencer,

R.G.M., Jeppesen, E., Brookes, J.D., Kothawala, D.N., Wu, F.C., 2023. Key factors driving dissolved organic matter composition and bioavailability in lakes situated along the Eastern Route of the South-to-North Water Diversion Project, China. *Water Research* 233.

<http://dx.doi.org/10.1016/j.watres.2023.119782>

Zhu, X.P., Zhang, C., Yin, J.X., Zhou, H.C., Jiang, Y.Z., 2014. Optimization of Water Diversion Based on Reservoir Operating Rules: Analysis of the Biliu River Reservoir, China. *Journal of Hydrologic Engineering* 19, 411-421. [http://dx.doi.org/10.1061/\(asce\)he.1943-5584.0000805](http://dx.doi.org/10.1061/(asce)he.1943-5584.0000805)

Zhuan, X.T., Li, W., Yang, F., 2016. Optimal operation scheduling of a pumping station in east route of South-to-North water diversion project. *ICAE* 105, 3031-3037.

<http://dx.doi.org/10.1016/j.egypro.2017.03.623>
